# Supplementary material
Source: Frontiers journal article supplement (https://www.frontiersin.org/articles/268250)
Supplement: Data_Sheet_2.PDF [file Data_Sheet_2.PDF]

## Script to analyze the Rugby Data

```
library(ggplot2)
```

```
library(dplyr)
```

```
library(tidyr)
```

```
library(lme4)
```

### 1) Read Data (Set the working directory properly)

```
Data <- read.csv("RawRugbyData.csv")
```

“RawRugbyData.csv” is a comma separated document with a header and 12240 rows of data. The header contains the columns names for each variable, and each row is an observation.

The variables are:

Observer: the initials of the observers

Performance: how many hits per trial (0 = 0; 25 = 1; 50 = 2; 75 = 3; 100 = 4)

Group1: for the player group, indicates their desagregated position in the field

Group2: for the palyer group, indicates their position in the field

Time: how long last the stimulus on the screen (Factor; levels = Short / Long)

Speed: how fast was the motion of the circles in the MOT task (Factor; levels = Slow / Medium / Fast)

Rep1: which number of repetition whithin each condition (From 1 to 20)

Rep2: which number of repetition across conditions (From 1 to 120)

PerfBin: performance coded binomialy: 3 or more hits = 1, else 0

Condic: a combination of Speed and Time (Factor; levels = 1 to 6)

## 2) Set factor order and rename variables

```
DataGroup <- -factor(DataGroup2, levels = c("Control","Backs","Forwards"))
DataTime <- -factor(DataTime, levels = c("Short","Long"))
DataSpeed <- -factor(DataSpeed, levels = c("Slow","Medium","Fast"))
DataBinaryPerf <- -DataPerfBin
DataCondition <- -DataCondic
```

### 3) Summarize

```
SumData <- Data %>% group_by(Observer, Group, Time, Speed, Condition) %>% summarise(ProbPerf =  
sum(BinaryPerf)/n())
```

### 4) Draw the boxplot (Descriptive Statistics)

```
BoxPlot <- ggplot(data = as.data.frame(SumData), aes(Group, ProbPerf, color = Group)) + geom_boxplot()  
+ theme_bw() + ylab("Performance") + facet_grid(Speed ~ Time) + stat_summary(fun.y=mean,  
colour="black", geom="point", shape = 3, size = 3) + geom_text(aes(x = 3.5, y = 0.1 , label =  
Condition), color = "black", size = 4) + theme(legend.position = "none", text = element_text(size = 12),  
axis.title.x=element_blank(), axis.text.x = element_text(size = 12), axis.text.y = element_text(size = 12))  
+ scale_colour_manual(values = c("grey70", "black", "grey70"))
```

### 5) Fit the model

```
FullModel <- glmer(BinaryPerf ~ (Speed + Time) * Group + Rep2 + (1|Observer), data = Data, family =  
binomial, control = glmerControl(optimizer = "bobyqa"))
```

### 6) Predictions

```
Predictions <- predict(FullModel, type = "response") Results <- Data %>% mutate(Preds = Predictions)
```

### 7) Results summary

```
ResumeOut <- Results %>% group_by(Group, Condition) %>% summarise(ProbGood = mean(Preds),  
ProbPerf = sum(BinaryPerf)/n()) %>% gather(key = Probs, value = Prob1, ProbGood, ProbPerf) %>%  
data.frame()
```

### 8) Draw result chart

```
PredictionsPlot <- ggplot(data = ResumeOut, aes(Group, Prob1, color = Probs)) + geom_point() +  
theme_bw() + ylab("Performance") + facet_wrap(~Condition, 1, 6) + theme(legend.position = "none", text  
= element_text(size = 12), axis.title.x=element_blank(), axis.text.x = element_text(size = 12, angle = 45,  
vjust = 0.5), axis.text.y = element_text(size = 12)) + scale_colour_manual(values = c("grey70", "black")) +  
ylim(c(0.25,1))
```

### Caterpillar figures

#### 1) extract random effects

```
RandomsEf <- ranef(FullModel, condVar=TRUE) Randoms.DF <- data.frame(Observer = row-  
names(RandomsEf[[1]]), int=unname(RandomsEf[[1]]), se=sqrt(c(attr(RandomsEf[[1]], "postVar"))),  
row.names = NULL)
```

## 2) include group factors

```
GroupedData <- Data %>% group_by(Observer, Group) %>% summarise(ProbPerf = sum(BinaryPerf)/n())
%>% select(Observer, Group) Randoms.DF <- Randoms.DF %>% left_join(GroupedData) %>% arrange(int)
```

## 3) Plot the caterpillar

### a) All together

```
ggplot(Randoms.DF, aes(reorder(Observer, int), int, ymin=int-1.96se, ymax=int+1.96se)) + geom_pointrange(aes(colour=Group)) + coord_flip() + xlab("Observers")
```

### b) faceted by Group

```
ggplot(Randoms.DF, aes(reorder(Observer, int), int, ymin=int-1.96se, ymax=int+1.96se)) + geom_pointrange(aes(colour=Group)) + coord_flip() + facet_grid(Group ~ .) + xlab("Observers")
```

## Save the graphs in a suitable format

```
ggsave("RugbyBoxPlot.tiff", plot = BoxPlot, width = 15, height = 10, units = "cm")
```

```
ggsave("RugbyPredsPlot.tiff", plot = PredictionsPlot, width = 15, height = 10, units = "cm")
```
